# Supplementary material
Source: PubMed Central journal article supplement (PMC3123420)

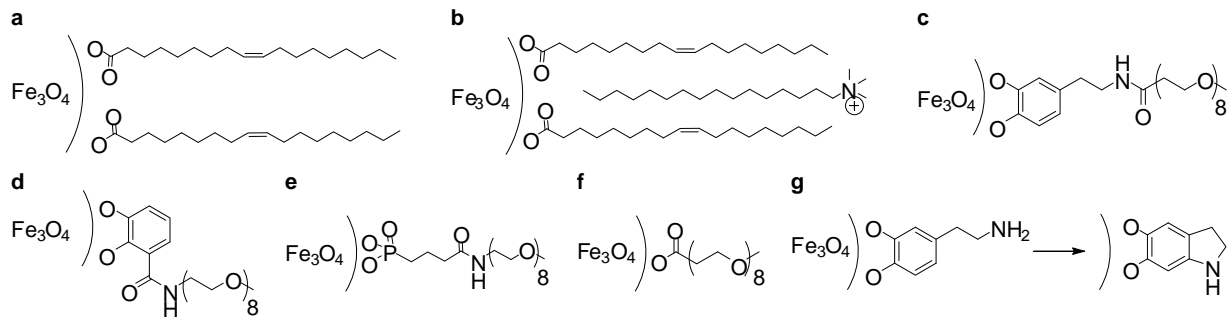

Supplement: NIHMS278667-supplement-Supp_Fig_S1.pdf [file NIHMS278667-supplement-Supp_Fig_S1.pdf]

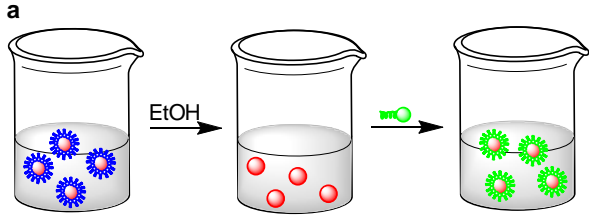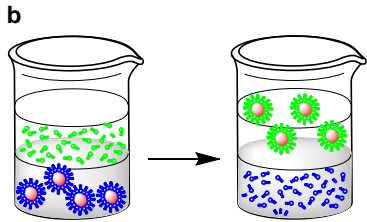

Supplement: NIHMS278667-supplement-Supp_Fig_S2.pdf [file NIHMS278667-supplement-Supp_Fig_S2.pdf]
